# Supplementary material for: Understanding adsorption of CO2, N2, CH4 and their mixtures in functionalized carbon nanopipe arrays
Source: Royal Society of Chemistry journal article supplement (doi:10.1039/c5cp07422c), 2016-01-01

## Supporting information

### Understanding Adsorption of CO<sub>2</sub>, N<sub>2</sub>, CH<sub>4</sub> and its Mixture in Functionalized Carbon Nanopipe Array

Prosun Halder,<sup>a, b</sup> Manish Maurya,<sup>a, b</sup> Surendra K. Jain<sup>a</sup> and Jayant K. Singh<sup>a\*</sup>,

a) Department of Chemical Engineering, Indian Institute of Technology Kanpur, Kanpur-208016, India

b) Prosun Halder and Manish Maurya contributed equally to this work.

\* Corresponding author. E-mail: [jayantks@iitk.ac.in](mailto:jayantks@iitk.ac.in) Phone: +91-512-2596141, Fax: 91-512-2590104

#### Supporting information S1:

Radial distribution function of C-C atom in the CMK-5 material are given below,

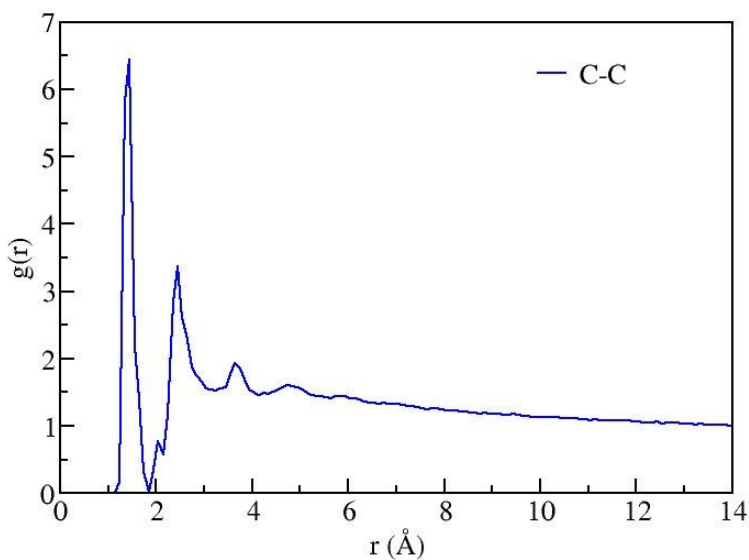

### Supporting information S2:

The chemical potential of reservoir gas,  $\mu$ , is connected through pressure as

$$\beta\mu = \beta\mu_{id.gas}^0 + \ln(\beta p_{id.gas})$$

where  $p_{id.gas}$  is the pressure of the reservoir assuming ideal gas.

$\mu_{id.gas}^0$  and  $\beta$  are the reference chemical potential and  $1/k_B T$ , respectively.

List of chemical potentials used in the simulation and the corresponding pressure based on the above relation.

| Chemical potential ( $\beta\mu$ ) kcal/mol | Pressure (bar) |
|--------------------------------------------|----------------|
| -11.0                                      | 0.70           |
| -10.5                                      | 1.15           |
| -10.0                                      | 1.89           |
| -9.5                                       | 3.13           |
| -9.0                                       | 5.16           |
| -8.5                                       | 8.51           |
| -8.0                                       | 14.03          |
| -7.8                                       | 17.13          |
| -7.5                                       | 23.13          |
| -7.0                                       | 38.13          |

### Supporting information S3:

Simulation snapshot of adsorbed gases at different reservoir pressures.

P = 0.7 bar

P = 5.16 bar

P = 38.13 bar

CO<sub>2</sub>

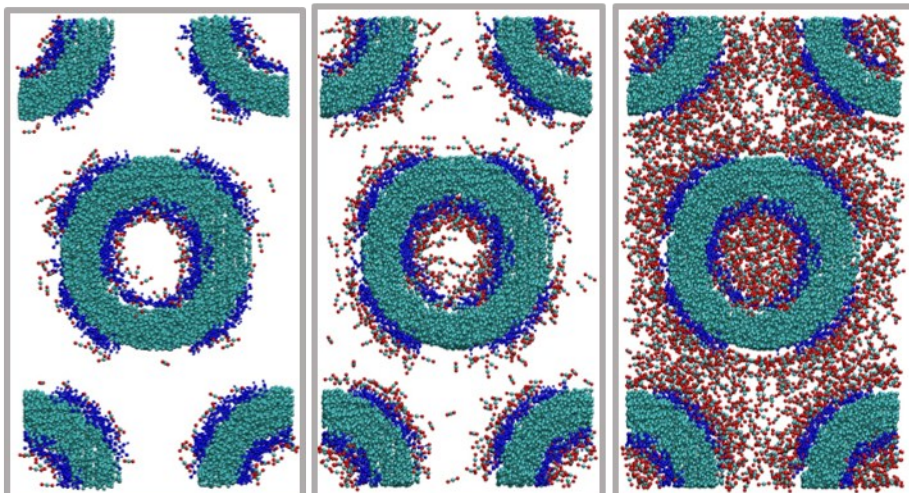

CH<sub>4</sub>

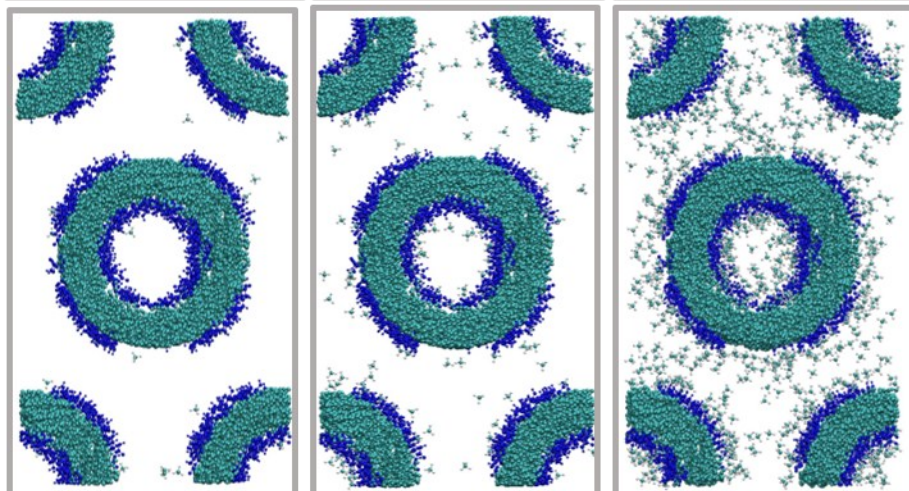

N<sub>2</sub>

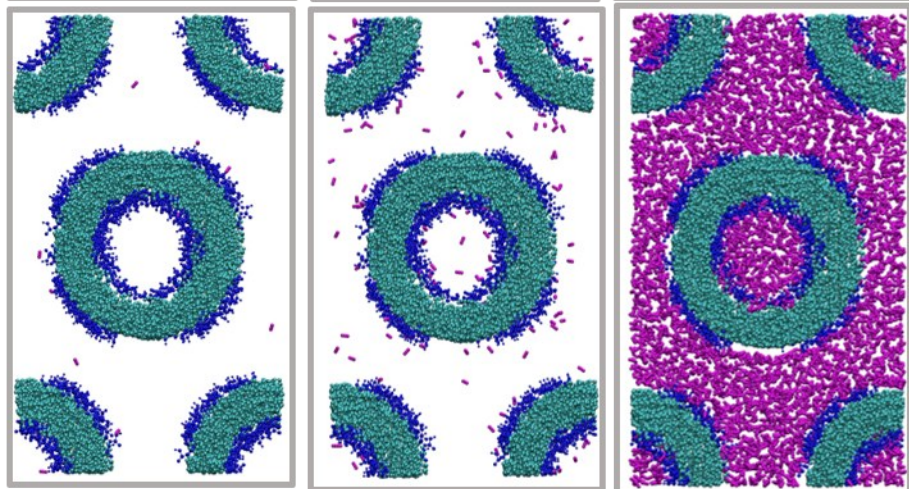

Supplement: c5cp07422c1.pdf [file c5cp07422c1.pdf]
